# Supplementary material for: Palbociclib plus endocrine therapy in hormone receptor-positive and HER2 negative metastatic breast cancer: a multicenter real-world study in the northwest of China
Source: Springer Nature journal article supplement (doi:10.1186/s12885-023-10568-0), 2023-01-30
Supplement: MOESM1 [file 23968542]

Table S1. Data comparison between the current study and PALOMA trials.

| Subgroup                     | The current study |            |           | PALOMA2   |           | PALOMA3   |
|------------------------------|-------------------|------------|-----------|-----------|-----------|-----------|
|                              | All               | 1st line   | 2d line   | Asian     | Non-Asian | All       |
| <b>Sample size (n)</b>       | 211               | 85         | 78        | 65        | 379       | 347       |
| <b>Treatment</b>             |                   |            |           |           |           |           |
| <b>Pal+FULV</b>              | 53.1%             | 41.2%      | 55.1%     | 0%        | 0%        | 100%      |
| <b>Pal+AI</b>                | 45.0%             | 55.3%      | 43.6%     | 100%      | 100%      | 0%        |
| <b>Age (median, range)</b>   | 53 (29–88)        | 55 (29–84) | 52(32–88) | 61(43–88) | 62(30–89) | 57(30–88) |
| <b>≥65y</b>                  | 19.4%             | 21.2%      | 21.8%     | 58.5%     | 59.4%     |           |
| <b>&lt; 65y</b>              | 80.6%             | 78.8%      | 78.2%     | 41.5%     | 40.6%     |           |
| <b>ECOG PS</b>               |                   |            |           |           |           |           |
| <b>0</b>                     | 34.6%             | 34.1%      | 38.5%     | 60%;      | 57.5%;    | 59%;      |
| <b>1</b>                     | 61.6%             | 62.4%      | 57.7%     | 30.8%     | 41.7%;    | 41%       |
| <b>2</b>                     | 3.8%              | 3.5%       | 3.8%      | 9.2%      | 0.8%      | 0         |
| <b>Race</b>                  |                   |            |           |           |           |           |
| <b>The rate of Asian</b>     | 100%              | 100%       | 100%      |           | 14.6%     | 21.0%     |
| <b>Menopausal Status</b>     |                   |            |           |           |           |           |
| <b>Menopausal</b>            | 67%;              | 69%;       | 68%       |           | 100%      | 79%       |
| <b>Premenopausal</b>         | 33%               | 31%        | 32%       |           | 0%        | 21%       |
| <b>Initial stage</b>         |                   |            |           |           |           |           |
| <b>De novo stage IV</b>      | 23.7%             | 31.8%      | 15.4%     | 20%       | 33%       | -         |
| <b>Relapsed &lt;12m</b>      |                   |            |           | 20%       |           |           |
| <b>Metastatic site</b>       |                   |            |           |           |           |           |
| <b>Bone only</b>             | 19.9%             | 23.5%      | 20.5%     | 18.5%     | 24.0%     | 22%       |
| <b>Visceral</b>              | 63.5%             | 51.8%      | 66.7%     | 53.8%     | 47.2%     | 59%       |
| <b>Prior Neo(adjuvant)</b>   |                   |            |           |           |           |           |
| <b>therapy</b>               | 73.0%             | 70.6%      | 66.7%     | 50.8%     | 47.5%     | 40%       |
| <b>CHT</b>                   | 60.7%             | 52.9%      | 38.5%     | 95.5%     | 75%       | 21%       |
| <b>ET</b>                    |                   |            |           |           |           |           |
| <b>Prior therapy for MBC</b> |                   |            |           |           |           |           |
| <b>CHT</b>                   | 38.9%             | 8.2%       | 48.7%     | 0%        | 0%        | 33%       |
| <b>ET</b>                    | 29.9%             | 0%         | 38.5%     | 0%        | 0%        | 46%       |
| <b>PFS (m)</b>               | 12.2              | 14.5       | 10.6      | 25.7      | 27.6      | 11.2      |
| <b>CR</b>                    | 0%                | 0%         | 0%        | 1.5%      | 2.4%      | 0%        |
| <b>ORR</b>                   | 21.8%             | 27.1%      | 21.8%     | 49.2%     | 45.9%     | 19%       |
| <b>DCR</b>                   | 90.5%             | 95.3%      | 89.7%     | 84.6% ‡   | 86.0% ‡   | 80%       |

‡ CR + PR + SD ≥ 24 weeks.

PAL, palbociclib; FULV, Fulvestrant; AI, Aromatase Inhibitors; ECOG, Eastern Cooperative Oncology Group; CHT, chemotherapy; ET, Endocrine therapy; PFS, Progression-free survival; CR, Complete

response; PR, partial response; SD, stable disease; ORR, objective response rate; DCR, disease control rate.
